# Supplementary material for: Amyloid β-Oligomers Inhibit the Nuclear Ca2+ Signals and the Neuroprotective Gene Expression Induced by Gabazine in Hippocampal Neurons
Source: MDPI journal article supplement (doi:10.3390/antiox12111972), 2023-11-06
Supplement: s1 [file s1]

## Supplementary Material:

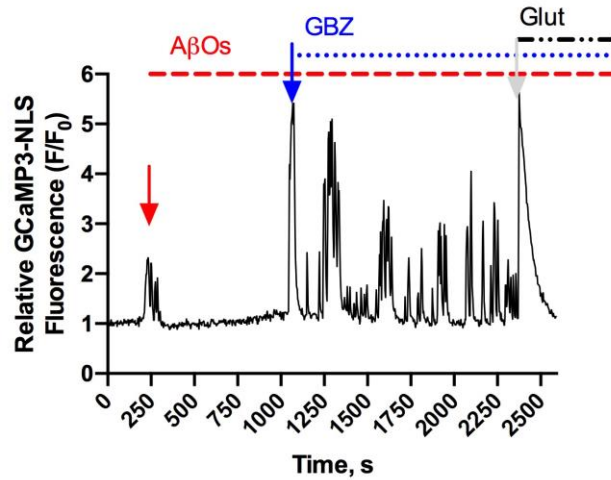

**Supplementary Figure S1. Treatment with A $\beta$ Os for 15 minutes does not disrupt the transient nuclear Ca<sup>2+</sup> signals induced by GBZ in pyramidal hippocampal neurons.** Neurons were treated with A $\beta$ Os (500 nM) at the microscope stage at the time indicated by the red arrow, and the relative change in fluorescence values with time ( $F_{\text{max}}-F_0/F_0$ ) was recorded for 15 minutes in the nucleus of neurons expressing GCaMP3-NLS before GBZ addition (red dashed line). After addition of 5  $\mu$ M GBZ (blue arrow), the typical oscillatory and synchronous Ca<sup>2+</sup> signals induced by GBZ can be observed (blue dashed line). Also, the record shows that addition of 10  $\mu$ M glutamate causes a high intensity transient of Ca<sup>2+</sup> in the nucleus of these neurons. A representative graph of three experiments performed in independent cultures is shown

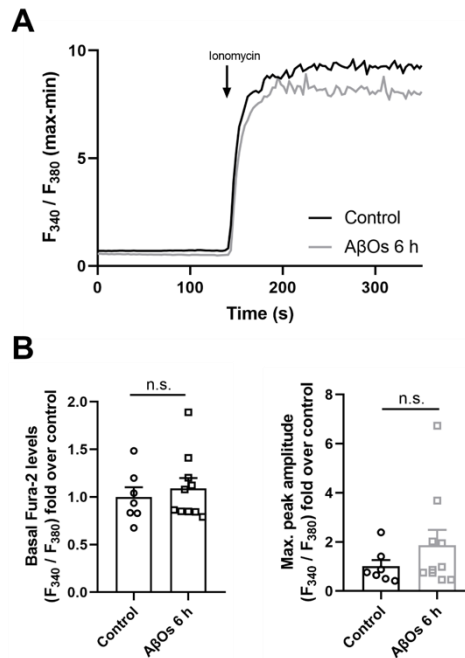

**Supplementary Figure S2. Cytoplasmic  $\text{Ca}^{2+}$  levels in primary hippocampal neurons.**

**A)** Representative records of the relative change in Fura-2 fluorescence ( $F_{340}/F_{380}$ ) with time, displayed by control neurons or neurons treated for 6 h with AβOs (500 nM). The arrow indicates the time of ionomycin addition. **B)** The basal Fura-2 fluorescence levels and the maximal peak amplitude following ionomycin addition were quantified. The average values obtained from a minimum of seven experiments performed in independent cultures show no significant differences between control neurons and neurons preincubated with AβOs. Data are expressed as Mean  $\pm$  SE. Statistical analysis was performed with Mann-Whitney Test. N.s. not significant.

**Supplementary Table S1:** Sequence of primers used to determine the mRNA levels of the RyR2, BDNF exon IV, Npas4, Nqo1 and  $\beta$ -actin. (ref ncbi)

| Gene           | NCBI Sequence  | Reference | forward (5' $\rightarrow$ 3'): | reverse (3' $\rightarrow$ 5'): |
|----------------|----------------|-----------|--------------------------------|--------------------------------|
| RyR2           | NM_001191043.3 |           | AATCAAAGTGCGGAATTTCTTG         | TCTCCCTCAGCCTTCTCCGGTTC        |
| Npas4          | NM_153626.1    |           | CCGCCATGCAATTTCCACTA           | CGGTCCCCAAGGTTCTAGACT          |
| Nqo1           | NM_017000.3    |           | CTTTCAGAATAAGAAGACCTTGC        | TGCTGTACACCAGTTGAGGTT          |
| $\beta$ -actin | NM_031144.3    |           | TCTACAATGAGCTGCGTGTG           | TACATGGCTGGGGTGTGAA            |

**Supplementary Video S1: Treatment with A $\beta$ Os disrupts the transient nuclear Ca<sup>2+</sup> signals induced by GBZ in hippocampal neurons.**

**<https://www.dropbox.com/home/Andrea%20Paula%20Lima/Papers/Paper%20Pedro%20AbOs%20Nuclear%20Calcium?preview=VIDEO-2023-08-28-20-27-22.mp4>**
